# Supplementary material
Source: PubMed Central journal article supplement (PMC3416163)
Supplement: JVI.00121-12_zjv999096376so1.pdf [file JVI.00121-12_zjv999096376so1.pdf]

## SUPPLEMENTARY INFORMATION

### **Biochemical analysis of the complex between the tetrameric export adapter protein Rec of HERV-K/HML-2 and the responsive RNA element RcRE pck30**

Janina S. Langner<sup>1</sup>, Nina V. Fuchs<sup>2</sup>, Jan Hoffmann<sup>3</sup>, Alexander Wittmann<sup>1</sup>, Bernhard Brutschy<sup>3</sup>, Roswitha Löwer<sup>2</sup> and Beatrix Suess<sup>1\*</sup>

<sup>1</sup>Institute for Molecular Biosciences and <sup>2</sup>Institute of Physical and Theoretical Chemistry, Goethe-University Frankfurt am Main, Max-von-Laue Straße 9, 60438 Frankfurt am Main, Germany, <sup>3</sup>Paul Ehrlich Institute, Federal Institute for Vaccines and Biomedicines, Paul-Ehrlich-Straße 51-59, D-63225 Langen, Germany

\* E-mail: [suess@bio.uni-frankfurt.de](mailto:suess@bio.uni-frankfurt.de); Tel: +49 69 798 29785; Fax: +49 69 798 29323

**Supplementary Table 1** Oligonucleotides used in this study.

| Oligonucleotide                 | Sequence <sup>a</sup>                                   | Application                                                                                                                       |
|---------------------------------|---------------------------------------------------------|-----------------------------------------------------------------------------------------------------------------------------------|
| Fwd_pck30uLTR21                 | gcatctgaattctaatacgactcactataggacagatgcttgaaggcag       | forward primer for PCR of RcRE pck30                                                                                              |
| Rev_pck30uLTR21                 | gcatcttctagacacataaacatctcaatgc                         | reverse primer for PCR of RcRE pck30                                                                                              |
| Fwd_M1                          | P- actgcggatcgccgag                                     | forward primer for insertion of mutation in AAGG motif in M1                                                                      |
| Rev_M1                          | ttttgtccctgggtacttgagattagg                             | reverse primer for insertion of mutation in AAGG motif in M1                                                                      |
| Fwd_M2                          | P-acctctgcctagttcagccaggtattg                           | forward primer for insertion of mutation in GGAA motif in M2                                                                      |
| Rev_M2                          | ccctgcggccttccg                                         | reverse primer for insertion of mutation in GGAA motif in M2                                                                      |
| Fwd_M3                          | P- ggtattgtccaccgtttctcccc                              | forward primer for insertion of mutation in AAGG motif in M3                                                                      |
| Rev_M3                          | tggctttcctaggcagaggtcc                                  | reverse primer for insertion of mutation in AAGG motif in M3                                                                      |
| Fwd_M4                          | P-ctcgtgggaccggaagacc                                   | forward primer for insertion of mutation in AAGG motif in M4                                                                      |
| Rev_M4                          | Gccatatttcagactttcacatgggg                              | reverse primer for insertion of mutation in AAGG motif in M4                                                                      |
| Fwd_M5                          | P-tgagacaagagctaggcatctgtctcc                           | forward primer for insertion of mutation in GGAA motif in M5                                                                      |
| Rev_M5                          | actgcaagaggcattccttctc                                  | reverse primer for insertion of mutation in GGAA motif in M5                                                                      |
| Fwd_RcRE pck30 + SacII          | caacaaccgagcagatgcttgaaggcagc                           | forward primer for amplification of mutated RcRE pck30                                                                            |
| Rev_RcRE pck30 + XhoI           | Catctactcgagcacataaacatctcaatgctttac                    | reverse primer for amplification of mutated RcRE pck30                                                                            |
| Hp_allkIRNAs(5-3)               | gcatctgaattctaatacgactcactataggctgtacagcttgtc           | forward oligonucleotide for fill in PCR for hairpin_GGAA, hairpin_GGA, hairpin_AAGG, hairpin_purine rich, hairpin_pyrimidine rich |
| Hp_GGAAloop (3-5)               | gcatcttctagagatcactactgctcggccttctcgacaagctgtacgacctata | reverse oligonucleotide for hairpin_GGAA                                                                                          |
| Hp_GGAAloop(3-5)                | gcatcttctagagatcactactgctcggccttctcgacaagctgtacgacctata | reverse oligonucleotide for hairpin_GGA                                                                                           |
| Hp_AAGGloop(3-5)                | gcatcttctagagatcactactgctcggccttctcgacaagctgtacgacctata | reverse oligonucleotide for hairpin_AAGG                                                                                          |
| Hp_purine rich(3-5)             | gcatcttctagagatcactactgctcggccttctcgacaagctgtacgacctata | reverse oligonucleotide for hairpin_purine rich                                                                                   |
| Hp_pyrimidine rich (3-5)        | gcatcttctagagatcactactgctcggccttctcgacaagctgtacgacctata | reverse oligonucleotide for hairpin_pyrimidine rich                                                                               |
| middle-primer_SHAPE_pck30uLTR21 | Cy5-cctctgtctcaactgcaag                                 | primer for SHAPE binding in the middle of the structure                                                                           |
| 3'-primer_SHAPE_pck30uLTR21     | Cy5-cataaacatctcaatgctttac                              | primer for SHAPE binding at the 3' end of the structure                                                                           |

<sup>a</sup> 5' phosphorylated primer are indicated by P-; primer for SHAPE analysis were 5' Cy5 labelled indicated by Cy5-
